# Supplementary material
Source: HighWire-hosted journal article supplement (https://bmjpaedsopen.bmj.com/content/3/1/e000413)
Supplement: inline-supplementary-material-1 [file inline-supplementary-material-1.pdf]

## Supplementary material

**Suppl. Table 1.** Number of questionnaires completed (to the degree that a score could be formed) at baseline and 2-years for children and parents in this study.

|                                 | Children (n=90 baseline, n=64 2-year) |                  |             |                  | Parents (n=89 baseline, n=64 2-year) |                  |             |                  |
|---------------------------------|---------------------------------------|------------------|-------------|------------------|--------------------------------------|------------------|-------------|------------------|
|                                 | Baseline                              |                  | 2 years     |                  | Baseline                             |                  | 2 years     |                  |
|                                 | Summer-camp                           | Lifestyle-school | Summer-camp | Lifestyle-school | Summer-camp                          | Lifestyle-school | Summer-camp | Lifestyle-school |
| <i>Child self-report, KINDL</i> |                                       |                  |             |                  | <i>Parent-proxy report, KINDL</i>    |                  |             |                  |
| Total                           | 45 (1 m)*                             | 43 (1m)*         | 37          | 26               | 45 (1m)*                             | 43 (1m)*         | 36          | 24               |
| Physical                        | 45                                    | 43               | 37          | 27               | 45                                   | 42               | 36          | 24               |
| Emotional                       | 45                                    | 43               | 37          | 27               | 45                                   | 42               | 36          | 24               |
| Self-esteem                     | 45                                    | 43               | 37          | 27               | 44                                   | 43               | 36          | 24               |
| Family                          | 45                                    | 43               | 37          | 26               | 45                                   | 43               | 36          | 23               |
| Friends                         | 45                                    | 43               | 37          | 26               | 44                                   | 43               | 36          | 24               |
| School                          | 45                                    | 43               | 37          | 26               | 44                                   | 43               | 36          | 24               |
| Adiposity specific              | 43                                    | 44               | 36          | 27               | 43                                   | 42               | 37          | 27               |
| <i>Parent self-report</i>       |                                       |                  |             |                  |                                      |                  |             |                  |
| Physical dimension (SF-36)      |                                       |                  |             |                  | 30                                   | 29               | 25          | 19               |
| Mental dimension (SF-36)        |                                       |                  |             |                  | 30                                   | 29               | 25          | 19               |
| Emotional dimension (OWLQOL)    |                                       |                  |             |                  | 43                                   | 39               | 36          | 22               |
| Number of symptoms (WRSM)       |                                       |                  |             |                  | 45                                   | 39               | 36          | 21               |
| Symptom distress (WRSM)         |                                       |                  |             |                  | 43                                   | 39               | 32          | 17               |

\*(n)m; n=number of m(issing) data.

**Suppl. Table 2.** Between-group differences in HRQoL of children and parents from baseline to 2-year follow-up, no replacement of missing values.

| Outcome                           | Mean difference   | P group | Effect size<br>Cohen`s d |
|-----------------------------------|-------------------|---------|--------------------------|
| <i>Child self-report, KINDL</i>   |                   |         |                          |
| Total HRQoL                       | 2.0 (-2.0, 6.2)   | 0.33    | 0.19                     |
| Physical                          | 4.7 (-1.2, 10.6)  | 0.11    | 0.28                     |
| Emotional                         | 1.5 (-3.9, 6.9)   | 0.58    | 0.09                     |
| Self-esteem                       | -2.3 (-8.8, 4.2)  | 0.48    | 0.13                     |
| Friends                           | 4.3 (-2.0, 10.5)  | 0.18    | 0.26                     |
| Family                            | -0.8 (-6.1, 4.6)  | 0.78    | 0.01                     |
| School                            | 3.9 (-1.9, 9.6)   | 0.19    | 0.25                     |
| Adiposity specific                | 7.3 (1.5, 13.2)   | 0.015*  | 0.45*                    |
| <i>Parent-proxy report, KINDL</i> |                   |         |                          |
| Total HRQoL                       | 3.5 (-0.8, 7.8)   | 0.11    | 0.29                     |
| Physical                          | 4.3 (-2.3, 11.0)  | 0.20    | 0.25                     |
| Emotional                         | 3.4 (-2.5, 9.4)   | 0.25    | 0.20                     |
| Self-esteem                       | -1.5 (-6.5, 3.6)  | 0.56    | 0.08                     |
| Friends                           | 4.0 (-2.3, 10.3)  | 0.21    | 0.24                     |
| Family                            | 0.2 (-5.5, 5.9)   | 0.94    | 0.01                     |
| School                            | 4.3 (-0.4, 9.1)   | 0.07    | 0.31                     |
| Adiposity specific                | 9.0 (3.0, 15.0)   | 0.004*  | 0.55*                    |
| <i>Parent self-report</i>         |                   |         |                          |
| Physical dimension (SF-36)        | 3.9 (0.5, 7.2)    | 0.023*  | 0.46                     |
| Mental dimension (SF-36)          | 3.1 (0.2, 6.1)    | 0.039*  | 0.39                     |
| Emotional dimension (OWLQOL)      | 7.4 (-1.3, 16.0)  | 0.09    | 0.32                     |
| Number of symptoms (WRSM)         | -0.2 (-1.6, 1.2)  | 0.78    | 0.04                     |
| Symptom distress (WRSM)           | -6.3 (-14.2, 1.7) | 0.12    | 0.28                     |

Results are presented as estimated mean difference between the treatment groups (linear mixed model) with 95% confidence interval, effect size is presented by Cohen`s d.

**Suppl. table 3.** Reliability of scales in the questionnaires in this study measured by Cronbach's alpha coefficients.

| <b>Questionnaire</b>                         | <b>Scale or subscale</b>            | <b>Cronbach's alpha</b> |
|----------------------------------------------|-------------------------------------|-------------------------|
| KINDL – child self-report                    | Total                               | 0.82                    |
|                                              | Physical well-being                 | 0.52                    |
|                                              | Emotional well-being                | 0.61                    |
|                                              | Self-esteem                         | 0.69                    |
|                                              | Family                              | 0.55                    |
|                                              | Friends                             | 0.61                    |
|                                              | School                              | 0.41                    |
| KINDL – parent-proxy report                  | Total                               | 0.89                    |
|                                              | Physical well-being                 | 0.68                    |
|                                              | Emotional well-being                | 0.79                    |
|                                              | Self-esteem                         | 0.83                    |
|                                              | Family                              | 0.73                    |
|                                              | Friends                             | 0.73                    |
|                                              | School                              | 0.43                    |
| KINDL adiposity module – child self-report   | Adiposity specific                  | 0.81                    |
| KINDL adiposity module – parent-proxy report | Adiposity specific                  | 0.88                    |
| SF-36                                        | Physical dimension (summary factor) | 0.89                    |
|                                              | Mental dimension (summary factor)   | 0.91                    |
| OWLQOL                                       | Total                               | 0.95                    |
| WRSM                                         | Number of symptoms                  | 0.83                    |
|                                              | Symptom distress                    | 0.90                    |
